# Supplementary material for: Genome-wide analysis of chicken snoRNAs provides unique implications for the evolution of vertebrate snoRNAs
Source: PubMed Central journal article supplement (PMC2653536; doi:10.1186/1471-2164-10-86), 2009-02-22
Supplement: 1471-2164-10-86-S2.pdf [file 1471-2164-10-86-S2.pdf]

## Additional file 2. Sequences of snoRNA genes in *G. gallus*.

| snoRNA ID                   | Sequence (5'-3')                                                                                                             |
|-----------------------------|------------------------------------------------------------------------------------------------------------------------------|
| <b>Guide box C/D snoRNA</b> |                                                                                                                              |
| GGgCD1                      | GTCTGAGTGTGTTGGAGGATGAGCCTTTGAGTGATCCATCGGCAGAGCTTGATGTTGCTGTGCTGACACTCGTGCTGCTGA                                            |
| GGgCD2                      | GGCACCCTGTTCGGATGTGATGTAAGCGCCCACCTGACCCCCGTGGAGGCAAAAAGCTGATTTAATGAGGCTGATCCGACAGCTGTACC                                    |
| GGgCD3                      | CAGGAGTTCGTGCAGATGATGTAACAATTTTACCACCTGAGTAACTGATGTTCCCAAAGGAACCACTGATGCACACCATCGTGA                                         |
| GGgCD4                      | GAGCTCTGGGGTACAAATGATGATTTTCAAGCGACCAAAGCCTGAGAGTTTGTGATTAGAACTTCTTTGGTAACTGATGTACCCCAAATGTT                                 |
| GGgCD5a                     | TGATTTCTTTAGGTCTGTGATGATTTTGGCATGTATTATCTGAGCATAAAGTGTGAAGATTATCAGTTTAGCTCTAGAATTACTGACCTTAGAAATAAA                          |
| GGgCD5b                     | TTGTTTTCTTGGGTCAATGATGATTTGGTGGCATGTATTATCTGATGTAAAGGTGATGTTTATCATCACATTAGCTCTAGAATTACTGACCCAGGAAACTGA                       |
| GGgCD6                      | TGTGTAAGCTGCCTGTGTGATGATGACATGAATACACTGACTTCAATCATGGAGGTCTGCAATTAGCTCTATCTTCAGGCATCTGAC                                      |
| GGgCD7                      | GGCCGGCCGCAGTCAGATGATGATGAAGTCTCCGGAATCGCTGTACTGCATTGATGATTCCCTCGAACCCCTAGTCTGTGGCTGCGGCAGCTC                                |
| GGgCD8                      | GCATAAGAGCTGTACAATGATGATGACTTTGGCTCCCTCTACTGATACTTGTGAGGAAAGCAGCCATATGTTACCCAATACCTGAGTACAGCAGTTTT                           |
| GGgCD9a                     | GAAACTTGACTTGCAATGATGATATCAGATTCCAAAGCCATTTCGTAGTTTCCACCAGAAGTCTACTAATGATGGCCAAAACCTTCCTTGGATGTGCGAGCTGTGGGGCT               |
| GGgCD9b                     | TGAATATCTGGTTGCAATGATGATAAGTGATTCTGTGCCATTTCGTAGTTTCCACCAGAAGTCGAAAGACGAGTGTGGTCCAAGTACCTTCCTTGGATGTGCGACCAAGGCATT           |
| GGgCD9c                     | GTTGCTACTGGTTGCAATGATGATAAGTGATTCTGTGCCATTTCGTAGTTTCCACCAGAAGTCGAAAGACGAGTGTGGTCCAAGTACCTTCCTTGGATGTGCGACCACAGTTAGC          |
| GGgCD10a                    | TTGCTGTGCGAGTTCGATGATGAACCATGGAATAAGCGCTGGGCACAGCGCTGACATCCGTGAGGAGTCATTCCATGCTGCCTTCCTTGAACAACACTTCCTA                      |
| GGgCD10b                    | TTGCTCTGCGAGTTCGATGATGAACCATGGAATAAGCGCTGGGCACAGCGCTGACATCCGTGAGGAGTCGTTCCATGCTGCCTTCCTTGAACAACACTTCCTA                      |
| GGgCD11a                    | GCAAACCTGTCTTGCCATGATGATCGTAATTTGCGTCTTACTCTGTGCTCAGTGACAGTTGCCTGTCTCAGTGAAGTGGTACAGATGGTTGACGAACAGTTAATGCAAGTGTAA<br>AGAG   |
| GGgCD11b                    | AGTGTGGATATTGCTGTGATGTGTAATTTGCGTCTTATCCAGTGTTCAGCGACAGTTGCCTGCTGTTACCATGTTGGCACTGTTGAGCTGCAGACACATTTAATTGCAATAGCA<br>GAGGGG |
| GGgCD12a                    | CGCAGTCATGATGGCAATGATGATTTCCATATTTGTGGTTTTCTGATGTACAAATGTGAGGGTGCACAGTCACTACCTCATGCCATCTCAATCTG                              |
| GGgCD12b                    | AGCTTGGTAGTAGTCTGTGATGTGATGTTCTGGTTGGCCTGAATCCTTTTTGGAATATGAGGGCAACTTAAGTCACTACCTCTTGACACTGAGCCCCCT                          |
| GGgCD13a                    | ATGTAGTCTGTGTCAATGATGATGATACCTGTTGGAAGTGAATGTAGCTGATTGAGTCAACATTTTCGTCCTTACCAAGACAACAACAGATA                                 |
| GGgCD13b                    | TCCAGACTGTTGTCAATGATGATAACATAGTTAAGCTGAAAATAATGATATAAATTCAGTTCCTTCGTCACCTACCAAGACAACAGATGGGA                                 |

---

|           |                                                                                                               |
|-----------|---------------------------------------------------------------------------------------------------------------|
| GGgCD14   | GGTGCTCTGGGTGACATGATGACACAATGGATCCTTCTGATCCTTCCATCAAAGTACTCTAGGAAGTGGATCTGAAGACTCCTAAAAGCT                    |
| GGgCD15a  | TTCAGGAGGTCTGGCAATGATGACACACTTGCCTCTCTGAGAACAGTGTCTGTAATGAGAGAAGCTTTACATACTCAGCAGAGCTGAGCCAGACCTCAAGCA        |
| GGgCD15b  | CTGTGACCTTCTGGCGATGATGACCTCACTTGCCTCACTGAGATCCACTGCAGGGATTTTGTGAGAGCTTCTTCTGGACTCATTGTGAGCTGAGCCCTTGAGAAATAAC |
| GGgCD15c  | CTTTATGGGTCTGGCGATGATGACACACTTGCCTCACTGAGAACACTGTTTCAGTAATGAGAGCCTCACAGTGTGCACAGCTGAGCCGGGCTCGCAGGG           |
| GGgCD16   | TATCTGAGGATATCATATGATGAAACTAACCAAAAAATTGCTGGAATTACCGGCAGATTGACTGGTGGTGAGCAAAGTTTTTCTGATGATATCACTTAAAT         |
| GGgCD17   | TTTGACGTAGTTGGCTATGAGGATAAACTCTTAAACCTGAATTGCAGTGCATTTTTATACGCTATTCTGAGCCAACATCTTTTAA                         |
| GGgCD18a  | TGGACATGCTATGGCAATGATGATGATGAATTTCTTACCTGAGCTCAAAGTGAAGAGCGAAATAGACGAGCTTTTAAACCCTGAGCTTTAGCAAAGTGT           |
| GGgCD18b  | AGGCTTGGCCCTTGGCATGATGATGATGAATTTCTTACCTGAATCAACAATGAAGAGCAAATGAGCTTTTTAACACTGAGCAATTGCCACAGCC                |
| GGgCD19a  | CTGTTTTAAGTGAGCTGTGAAGAAATATATAAAGAAATCTGAGATTCTGTTGAAGTCATAAGATCCAACCTCTGAGCTCGCTGCCTTAGG                    |
| GGgCD19b  | ATTGTGAATGTGAGAAATGAGGATACAGACTTTGTCTGAGTTTTATATGAAGACTTCAGATCCAACCTCTGATCTCACATGGAAGAT                       |
| GGgCD19c  | TGTAATAGAGTGAAAAATGAAGATACCTTTCATTGCTTCTTACTACAGTGAAGACTTCAGATCCAACCTCTGATTTTCACTCTATGTTT                     |
| GGgCD20   | GCCTTATATGGTACATATGATGAGCTTGTGCAGTATGAGTAGAAACATTGATGCTGTAAACGCTTTCTGATGTGCCATTATGCTC                         |
| GGgCD21a  | CAAACAAGAAATGAGTGCATGATGATGTTTTAAACCTATTCCATTTCTGAAATAGTCTGTGGAAAAAATAAATCTGACTCTTTCTTGACTG                   |
| GGgCD21b  | TGCCAGAGGTGCAGAGATGATGATGCCAACACCTATTCCCTTTTTGCCAAGCATGAGCTGGCTCACTTCTCCTTCCTGAGCTGCCCTTGCCGTT                |
| GGgCD22   | ACAGCAGCTTCCTTCGCTGATGAGTAACCTTTTACTTTTCTTACTGAGCTTGCTGAAGCAACGTTTATTACTGAGGAAAGGGGTGA                        |
| GGgCD23a  | CATCCCATGCCTTCTTCTGATGATATTCTACTTTGTGCCATCGTGTCTGGGCCACTGATACTTCATGATGGTAAAGAGGATCTGAGGGGCAGGACACCT           |
| GGgCD23b  | CCCCTGCTTCTCTGTGATGATCAAGCCTTTGAGCCACTGTGTCTGGGCCACTGATGTGAGTGGAACTGAGGATCTGAGCAGGCAGACGGGGA                  |
| GGgCD24   | CCGCCCGCCGTTGGAGATGATGATGCTGAGTGAATCTGTCAATCCACTGAGCCGCTGTGCTGACAGCCCTCACTGCTGATCCCGGCCCGGGCGC                |
| GGgCD25a  | GTGGCAGTCTGGTCTGATGATGACACCATGCACCACTCTGATGCTCCGTGATGCATGACTGATAGAAGCTGAGACCTGGGGCTGCAC                       |
| GGgCD25b  | ACAGAAATCCATGGTCTGATGATGAAATCATGCACCAGCTGAGGTTTGTATGCATAACCCCATGTCATCTGAGACTTGGATTGCTTT                       |
| GGgCD26   | AAACAACAAAACAGCTATGATGACCTCCTATAATGTTGATCTTACGACATGATCATGTTCTCTAAGAAGTTCTGAGCTTAAAGGTTAAAT                    |
| GGgCD27   | TTAAAATATGGCAACAATGATGACAGGTACTGTAACCTGTATGTGATAFTTCACTTACTGCATGGAGACACCAGTCCCTCTAAAATCTGATGTTGCCATATTTGC     |
| GGgCD28   | TTTTTCCTCAGCACAAATGATGATTTATAAGGGACTTAATACTGAAATGTGATGTGATTTTTGAGCAGAAATGATGCTAATGCTGTG                       |
| GGgCD29-1 | CCTTAACAGGCTACGTATGATGATTACTTCGACGGGCGGACATAAGGAAATCGCCTCTGGCGCTTGTGTTGAGTGTGAGTCTGAGTCCGTAGCCCTGTTTT         |
| GGgCD29-2 | CCTTAACAGGCTACGTATGATGATTACTTCGACGGGCGGACATAAGGAAATCGCCTCTGGCGCTTGTGTTGAGTGTGAGTCTGAGTCCGTAGCCCTGTTTT         |
| GGgCD30   | AGTGGATGTGCTGGATATGATGACCTGATTATCTGAAATGCTGATGAAACCACTTCTAAAGTCTCTAGATAGTCAAGTCTGATCCAGCAGTGTCTGT             |

---

---

GGgCD31 TTAGTTGCTGGAACAAATGATGATTTAAACCTTAGCTTGAACCTCTCACTGAACAGAGATGAAAACCTAAGGTCTGAGTTGTTCCAACAAGC

GGgCD32 CTAACCTGGCTGCTATGTGATGATACCCCAATGTCTGACCCTCCGTAGTAGGTCCATGGTGTGTAATGATGGACTGCGTAGTTTCAAGACGGGACTGATGGCAGCTGAAATGA

GGgCD33a TGGAAGACAGCCCAGAAATGATGATGATTCCACTTCATTGGTCCGTGTTTCTGAAACACATGATTTTGTGGAAGTTCTGACTTCTAGCTAAAGCA

GGgCD33b CTTTCGAGTCTTAAGAAATGATGATGACTTCTCACTGGTCCGTGTTTTCAGATTATCAGTGATGATTTGTGAAGTTCTGACTGAAGTGTCTTTGT

GGgCD33c GATTTGTTTTGCTGAAATGATGATGATTCCACTTCATGGTCCGTGTTTCTGAAACATATGATAACAGTGAAGTTCTGATGCTTGGTCCCAAGC

GGgCD34 CTATGGAACAAGTGATGTGATGATACACCATCTTCGGGGCTGACCTGAAATGGAGAGAAGTTGTAATGCTGATCACTTATTTCAAAG

GGgCD35 TGCTTTGACTGGTTACATGATGATGATAAAACAAAATCACCATCTTCGGCTGACAGCTGTGATGATTTGTTTCTTTCTGATAGTCCAGTCAA

GGgCD36a CTCCAAAGCAGATACAATGATGATTAACATAGTTCAGCAGATTATCTCGTGATGAACATGTTCTGTCTTCCTGCTCCTATCTGATCTAGCTGTTG

GGgCD36b TGTGAGAAGGCTGTGTATGATGATCAACATAGTTCAGCAGATAACTTGTGATGATCACTCTACTGGTCTTTGCTCCTATCTGATGCAGCCTCCTGTAC

GGgCD37a GCAGATCTGTCTTCTAATGATGATTACTTCTGTCCAGTTCTGCTACTGAAGGGAGAGCGATGACACTTGTGATGGAGACTTTGCGGT

GGgCD37b GTTTTGAAGTCTTCTGTGATGATGACCTTTGTCCAGTTCTGCTACTGAATTTGAGGGATGACTGTTTGGAGATCTGATAGAGACTTCATTGT

GGgCD38 CCTGTTACGTGTGCAGATGATGATGAAAAATACTTGCATCTGAATGGTAGTGCTGACATACATAACCACCAAGATCGCTGATCTCTTGCCCTCT

GGgCD39 ATCCTCTGGTGCCACAATGATGATCTGTATAGTTTGCTACTCTTGACCAAGAAAATGATGAGAGCTCAAACCACCATAATTTCTATCTGATGGCACAGCGACTTAG

GGgCD40 TCATTCTGCAGTTCATATGATGATGATATTTCTGTTCAACTGCTGAGTGACTCAGAAATGAACATAATTTCAATTTGATAGACTGGATGTA

GGgCD41 GTCTGAGGAATTTGTTGATGATGTTGGCAAAATGTTCAACTGCTCTGAAGAGAGTGAGTGAGAATGGCCTTTCTGATACAAATGTACTGCCT

GGgCD42 AAGCACAGCCTGGTCAATGATGATGACCTTTCTTTGGAGACTGCTGGATGAATCCTGCGGATATGGGGCTGATGGCCAGGCTGCAGCA

GGgCD43 ACGCCTCTGAGTCTCAATGATGATGAGCTTCTCTGACTGCTGCATAAAGCTGAGTGTGCTGTGCGGATGCCAACCTTGGAGAGCTGATGGACTCAGAGCTGCG

GGgCD44 CAGCCACCCTCTGCTGTGATGATGAACTTCGATGCCATCTGACTGCATCCCTGTGCGGAAACCAGAGGCTGTTTCTGATGCACCCTGAGCCTGT

GGgCD45 TCTGCTGCAGTGCCTGATGATGATGAAAATTTCTTCACTTTGACCTGACTTGTGTTGATTGAAGAAATTTGAGTATCTGACGCGAGCTGATGCTCGTTGCTCTGTG

GGgCD46a TAGCTTTACTGGCATCATGATGATGATATCTTTGCGGTTTACCCATCTGACTGGTGTGATGTGTATCTTTGAATCTGATAGTCCAGTACAGTT

GGgCD46b GTCTGCTGGCATTGTGATGATGATCTCTTTGCGGTTTACCCAGCTGATTTCTGTGATGAGTAACACTGTATCTGATGTTGCCAGCTCATCA

GGgCD46c GTCTGCTGGCCTTGTGATGATGATCTCTTTGCGGTTTACCCAGCTGATTTCTGTGATGAGTAACACTGTATCTGATGTTGCCAGCTCATCA

GGgCD47a ACGAGAGGCAATGGGAATGATGATGAAATTTACCTTAGGTAGATACGACAGACTGTTCTGGTCTGTAATGATCTGCCAATGCTGGGGTTTGTATAGTTACAATCCACGTTGCCTTC

CA

GGgCD47b TGAAGCAGTACGCAGGATGATGATGAACTGTGACCTTATGTGGCCTTGGGAGGCTTGGATGTCTGCTGGGTTACAATGATTGGGGTGTATAGTTACAATAGGCGTGCTTATAT

GGgCD48a CTGAGCATGCCCTTCCATGAAGAATGATGATGACGAGTCTGAAAGGGAATATCCTTGGCCAAAGTGCCTGCTTCTTGTGTTCTACAGCATGGATCTGGGGCCTTGGGTGAGAATTTGA

---

---

|          |                                                                                                                                                                                                                                                                             |
|----------|-----------------------------------------------------------------------------------------------------------------------------------------------------------------------------------------------------------------------------------------------------------------------------|
|          | GTGACCTAGAGCATTGTCTGA GAAGGGCTCAGTGCC                                                                                                                                                                                                                                       |
| GGgCD48b | TTTTGTCTCCCTTCAATGATGATAAGATGACGAGTCAGAAGGGATGTCCTTGTGCCAGCACAGCCTGGTCAGTGCCATGTTCTGTGGTGTGTACTAAGGCTGCCTTGGGCAGGATGTC<br>CTCCTCATTGGTTGATTCAGAGGCATTGTCTGA GAAGGGATACCTGAA                                                                                                 |
| GGgCD48c | TTCTTGATCCCTTCAATGATGATAAGATGACGAGTCAGAAGGGATGGCTCCTGCTGAGTGGTGCCTGCAGTGTACAGTTCTGTGCTGCTGCATGTGGTCTTCAGCAGGAGCATCCC<br>GTCGCTGAATGATTTAGAGGCATTGTCTGA GAAGGGATAGAGGCT                                                                                                      |
| GGgCD49  | TTTATCTTCTGGAGAAATGATGATAAGCGCAAGAAAGAGGCATTTGTCAAAGACTTGACTACAGCAATATTCTGA ATTCTTAAGTATGAA                                                                                                                                                                                 |
| GGgCD50a | GTGTGCCGTGTGTGAGATGATGATAAGTATTCATTCTCTGAGTGCAGTGGCACTGCCCTCCTGCAGCGCCCCGATTCTGTTCAGGGTCTGGGTGCCGTGCAGCCTCCAGAGACCC<br>TGCAGTCTCCAGTGTGCTGCTGGGGCTGCTGTGGTGTGTGGCTGGCTGCCTGCAGGAGCCAAGCAGTGC CGCCGGGTGAGGGCCCTCTGTGGGGGCTCTGTACCCTGAGACGA<br>GGGATGACATCTGA TTGCATACTGCCACC |
| GGgCD50b | GTGTGCCGTGTGTGAGATGATGATAAGTATTCATTCTCTGAGTGCAGTGGCACTGCCCTCCTGCAGCGCCCCGATTCTGTTCAGGGTCTGGGTGCCGTGCAGCCTCCAGAGACCC<br>TGCAGTCTCCATGTGCTGCTGGGGCTGCTGTGGTGTGTGGCTGGCTGCCTGCAGGAGCCAAGCAGTGC CGCCGGGTGAGGGCCCTCTGTGGGGGCTCTGTCCACTGAGACGA<br>GGGATGACATCTGA TTGCATACTGCCACC  |
| GGgCD51  | TAAGCATGTACTGTTCTATGATGATAAGTATTCACACAATGGGAATCTCTGAAAGAGACTGAGGAGGACTCTTGATCTGA AACAGTACACGCATT                                                                                                                                                                            |
| GGgCD52  | TTCCATGTGCCCGCACATGATGATAAACTATGTTGGTAGGGACATCTGAGAGGCTGATGAGTACCAACATATCTGA GCTGGGCATGTAGCA                                                                                                                                                                                |
| GGgCD53a | ACTCTGAAAAATGCAATGATGATACTCTTAAGTAGTGGTTTCAATTCAGTATTGTTGAATGAAGACCTGAATTCCTTGGCTGTGTCTGA GCATGTTTCCAGTAG                                                                                                                                                                   |
| GGgCD53b | GCTGGAAGCTATTTCTATGATGATAACCTTCAACTGTGGTTTCAACTTCTGACAGTTGAATGAGGACGTTGAATTCCTTGGCTGTGTCTGA GAATGCTGCCAGCAG                                                                                                                                                                 |
| GGgCD54a | AGCTCCCTGGCATGCAATGATGATACTCCATCTTGGTTTCGCTTTTTGTGAGTCCAGTGAAGACTCATTTCTCTTGGCTGTCTGA GCATGCCTTGTGGAG                                                                                                                                                                       |
| GGgCD54b | CCCCAAGGGCCTAGCTATGATGATAACCAATTTGGTTTTCGCTCACTACTGATGTGCAGTGGGACAATTCACTTGGCTGTCTGA GCAGGCTGTGCCAT                                                                                                                                                                         |
| GGgCD55  | CTGCGGGTGGTTCGCGATGATGATGAGTCCCTGGGCTGCCGGCGGTGACGCAGCGGGCTGCCGTGGCCTCGGCTGCGCGTGAGCTGCCAGCCCCAGCCCTGA GCGACCACTGCGGCT                                                                                                                                                      |
| GGgCD56  | AAAGTATTGGTAGCCAATGATGATAACTTGATTCTGCCAGATGAGTTTCTGTGATATTACCATTTCCTTCCATTCTTTCTGA GGTACACAGCTGCT                                                                                                                                                                           |
| GGgCD57a | GGTCTGCTGGTGTAGATGATGATACTGAACCTTTTTTCCCATCAGAGCGACAGTGTGATTACTCATCACTCTAGCCAGGCTTGTCTGA TGCACCAGCAGAGGA                                                                                                                                                                    |
| GGgCD57b | GCACCTGCTGGTGTAGATGATGATACTGAACCTTTTTTCCCATCAGAGCGACAGTGTGATTACTCATCACTCTAGCCAGATCTTGTCTGA TGCACCAGCAGAGAA                                                                                                                                                                  |
| GGgCD57c | GGACCTGCTGGTGTAGATGATGATACTGAACCTTTTTTCCCATCAGAGCGACAGTGTGATTACTCATCACTCTAGCCAGATCTTGTCTGA TGCACCAGCAGGAAA                                                                                                                                                                  |
| GGgCD57d | TGTCATTCTGTGGTATATGATGATACTTCAAACCTTTTTTCCCATCAGATCGGAATGCTGATACAGACTTGTGTTTAAAGCCAGATTTGTCTGA TTCCACAGATGCAAG                                                                                                                                                              |
| GGgCD58a | GTAGGTGTGCCCTGATATGATGATAATTTGTTTATGCTCTTCTCTGAAAAATGACACTGAAGGTACTCCAAAGACTCTGA TCAGGCACCTGTGGC                                                                                                                                                                            |
| GGgCD58b | GCTCCTCCAGCCTGAAATGATGATGATGAAATTCATGCTCTTCTCTGAAGTGTATGGTGGAGACAAC TAGATGAATTTCTGA TCAGGCTTTGTAGCT                                                                                                                                                                         |

---

---

|          |                                                                                                                                                                   |
|----------|-------------------------------------------------------------------------------------------------------------------------------------------------------------------|
| GGgCD59  | GACATTCTGGAGCTTGATGATGATTGTCTCCTATGATGCTTGTCTGAAAGCAAAGTGATCAAATCATTTCACCGGCACTGAAGCGACTGGAATGA                                                                   |
| GGgCD60  | TTAAATGGAGAGCCTGTGATGTTTTTCAGTATTAGAGTAGTGGACAGAAAGTATTTCTGAAAACCTCTGTGCTGAGGCTTTTTTCCATGC                                                                        |
| GGgCD61a | AGGCAAAGGGTTACTATGATGCTTATCTTAGGACACCTTTGGAATACCCATGGAATAAAAAGTTATTACTGAGCAACCTCAGCATTAA                                                                          |
| GGgCD61b | GGCAACTGTGATGGTGTGATGCTATCTTAGGACACCTTTGGAACAACCATGAAATAATAACTACTTTCTGAGTCATCTGCATGATG                                                                            |
| GGgCD61c | GTAGATCGAGATTGCTGTGATGCTTTCTTAGGACACCTTTGGATTCAATGTGAAAAGAACTTGTATTCTGAGCAATCTTATTAATA                                                                            |
| GGgCD61d | GGCATCTTTGATGGCGGTGATGCTATCTTAGGACACCTTTGGAACAACCATGAAATAATAACTTTTTTTCTGAGCCATCAGTGCATG                                                                           |
| GGgCD61e | AGGCAGAAGGGTTGCTGTGATGCTTATCTTAGGACACCTTTGGAATACTCATGAAAAAAATGTTATTTCTGAGCAACCTCGATGTTA                                                                           |
| GGgCD62  | GAGGGCCGTGGCTGCGGTGATGCTCTCTTAGGACACCTTTGAGTTGAGTTGTGAAAAGAAACGTAAGCTCTGAGCAGCTCCTCGGGGT                                                                          |
| GGgCD63  | GAGGCGGGCGAGCCGGGATGATTTCTGCCTTTCTGACACCTCGTCTGAGGGCGGGCGGGCCGTGCCACTGTGACGCGCTACGGCTGAGGCTCGCGCCCCGC                                                             |
| GGgCD64  | GGGAGAAACTGAGCCAATGATGCTGTGTTATCCCTGTCTGACAACCTCAGCTGTGAGGGAGAAACAATTGTCCAAGGCTTACGCACTTCT                                                                        |
| GGgCD65  | AAGTTGCTGGCTGTTGATGATGATACCCCGAATAGGAAGTCCGTCAGATCGGAGAACTGACGATAACCTTCTTATTTATCTGAATAACAGCTACATGT                                                                |
| GGgCD66  | GTCCAGCCCAAAGCACAATGATGATGGAAGCACTGAAACTGACTCTGTATGAAGTGCATTCAATCCAATGCTGCTTTGTGGCTTGCT                                                                           |
| GGgCD67  | AACTTGTTTGCTGGTGTGATGATGCTGAACTCACGATGGTCTTCTCAGAGTCCCTGTTGGTGAGGGGACTGTGACAATGCCAGTGGCAACTGCTGAAACCATCAGACACGTT                                                  |
| GGgCD68  | AGTGTGTGTGTGCTGATGATGATAATGTCAACACATCATTCTGAAGAGGAATGTGTGGAGACCTTCTGTAAAGCAGCACCTGTTT                                                                             |
| GGgCD69a | CTAGGGCAAGAAGCCTGTGATGCTTAGCCACAATGTCTGAACCTGGCTGAAGGATTTCTTCTGAAGACACACACTTGGGCAAGGCTTCCAGGAGAGG                                                                 |
| GGgCD69b | GTAGGGCAGGAAGCCTGTGATGCTTAGCCATGATGTCTGAACCTGGCTGAAGGACTTTCTGAAGATGAACCTCAGGCTGAGGCTTCCAGGGGAGA                                                                   |
| GGgCD70  | TCCAAACAGCTTGTCAATGATGATGTTCTTACTAAAATGTCTGAACATATGAACCTCATAGTGATTTTCAGTGCATTAAGATAAGCTGAAAAAA                                                                    |
| GGgCD71  | GTCTTACAGGGTTGTAATGATGATGTCTCAAAATGTCTGACCTGAAACTACTAATGTAGATTTCTTTTTTTTAAAGAAAACCCTGTATCTG                                                                       |
| GGgCD72a | TACAGTCCAAAATACAATGATGATGTTGTCTTTTCCAAGCACATATCTGATTGCGCTATGTGAAAATGACTGTTGCTGATTTTGGATTGA                                                                        |
| GGgCD72b | TCTATGCCAGAAAACCTGTGATGCTGATACTTCCAAGCACATATCTGACAGCTTTGTGAGGAAACATGAGTATTTCTGATTTTCTGGAGTGTAT                                                                    |
| GGgCD73  | AATGCTGCTTTCACATAGGATGATAAAGACATTTCTGCATAATCGGTGAGTGTGTCTGTAGTGCAAACTGCAAGTCTTCCA                                                                                 |
| GGgCD74  | GCTGCGCTGCTGAGGAATGATGATGCAATAAAAAGGCCGAATTGCAAGTGCCTCCAAAAGCAGTTTGTCTCTGTTGGAAGCACAAATGACAAAATGTCCGAAGCGAATGTTGTTCTCA<br>GAAAGCTTAT                              |
| GGgCD75  | GAATGTGTACTGAGCAATGATGATGTTTTAATTTGCCTGACTTCAAAAAGTGAAGGCTTCTACACTTGAAAGCTCAGAAATAAATA                                                                            |
| GGgCD76  | TTTTTGAAGAAGCAAATGATGATGATAATATTTCTTGGCCAAAAGAGAGAGAGTTGTGTGTGTGTGGTTGTATGACAGGGGTGTTTGTGAGAATTGTGTGCCTTATAATTTGGTGG<br>TGACAGCTAAACTGATAAGATCTGATTTGCTTCTTTCATCA |

---

GGgCD77 TTCTGCTCCAGCTTCATGCTGAGCACCTTCTCTGGCCTTATGGTTCAAGAAGAAGCAATGTTCTCATGTGGCTTGGCCACTGGGCAAACTGA AATTCATTTCCTCTG

GGgCD78 TGTTTTGTGAGGTCGATGATGACTTAGTAAAAGGTCTGATGGCACTGGGAAATTGCACACCATTACCTTTTTGGCTCCCAGCAGTCTTTGTTCTGTCATGCCATAGTAGACTATGACT  
GAGAAAGTGATTGCTGACAGTTTGGGATTAATTCAAGTCCAGCTCCCCACAGTGAAGGAGGTTTTGGTGTGAATGTCATCCAACAGAAGTGGTTGAGAGGAGCTCATGGTAGTGGTGTG  
CCTTCATGGTTGTGCATGATCTAAAGTTTTCAAGCTGAGACCTCCTCTACGTG

GGgCD79 TGCTTTGTTGAGGTCGTGATGATA TAGTAAAAGGTCTGATTGTCCCAAGACTTGCTCTTCTATGGCCTCTTCTCCCAGCAGTTTCTCCCAGTCCATGGCACAGCAATAGTATGACTGTGG  
GAGTGTCTGCTGACAGCATGTGATGTGTTCAAGTTCATGTTAACCTGAAGTATTGGAGACATGACTGTGATCAGCATCCCACAGACCTGCTTAAAGGAGTTGGGTTTTGGCTTGTATAT  
CTGGACGTATGATCTGACTTTTTCTGCTGACCTCTCCATAAC

GGgCD80 CCCAGGCAGCAGTTGATGATGATA GTAAAAGGCTAATGTGACTCAACCAGCAGGGTTGCTCCTCAGCCATTCCAGTATACAGGTCTGTAATCTTGGTGGACAATGCAGAGCTGTGCGTG  
TTCGCTGTAAGGGCAGGCCAGACAGAAAATCCCTTCCCCGTGTCCTGGGAAATAAATCCTTGGGACGTGTGAGCTCTGAGCAAGTGTCTTAGGAAGTACTGGTGACTGGGGAACAGG  
ATGGGAAAGTGCCTCCGAGGTTTTGGTTGCAGGGGGCAGCCATGTTACAGCTGGTGAGACGTGAGCACACATCTTTGGTAATCTGACTGCTCTAAGTC

GGgCD81 AGATTTCCCAAAGCAATGATGATA GTGAAGTATCTCTGAAGTGGTATGTCTGAGACTCTTTGTCTTTGCTCTGACCAGGGCATGATCACGTAATCTTCTCTGCTTATTAGGCTAA

GGgCD82 CCATTTCTCTGCGAGAATGATGATA GCTGCACTCTGGTGGAGCAACCATGTGAGTGACGTGGTCTCTGCTCAGAATCTCCCTGATGACAAAAGTGGTGACAGGGGCCATCTCGCT  
TTAGCAATA

GGgCD83 TGTTTCTTTCATGGCAATGATGATA TTGGCGCAGGGGTACGGACCTCAGCTAGATCATGGGAGCTGAGTGCAAAAGTGTGATTTCAAGTGCAGCTGGCGTGTGGCTGGCTCACTGGAAACAGG  
TTTGCATGAGAACTTCGCCAAAGAAGCTGACCATGTTACAACAA

**Orphan box C/D snoRNA**

GGoCD1 TGTATTGTACTGAGCAATGATGATA GTCTGTATTTGCCTGACTGCAAAAAAAGGATGAAGTCTTCCACACTTGAACTGCTCAGAATAAAATG

GGoCD2 CAGGGAACAGCCTCACATGATGATA TCCTTCTCTCCCTGATGGCTCCGATGGTGTGACATCAACCCAAAGCCTCTGAGAAGTTGAGGAGGCTGTTTCTCTG

GGoCD3 GTTTGTCTTGTGTCTTATGATGATA AGCTTCATAGGGCAGATTCTGAGTTGAGAAATGAAATTTCTCTCCACTGATACTTGCTGTATGCCATGGACACTATATATTG

GGoCD4 TTGCAGTATTTGGCCAAGGATGATA AAACAATCATCTGATTACTTGCATACTTACAGTGTATGCAGAAGTCTGATGGATTAAGGATTTTGGCCAAAACATAATAT

GGoCD5 TTCACTGAAGAGCCAAATGATGATA CAGCTAGATGGCATTAGCACTCAGTGCAAAAGATGACCTTCATCTATCACCCATGCTGCTCTGTGAGGGG

GGoCD6 TCTGGTCAAGAGCCAAATGATGATA CAACTGGTTGGCATTAGCACTCCGTGCAAAAGATGACCTTCATCTATCACCCATGCTGCTCTGGAGGGG

GGoCD7 TCTGGTTTGGGAATGAAATGATGATA CAAATGTTTCGGTCCCAGATGACACGAAATGATTTAAATTTCCATTTTCATTTCCATCCATACGATG

GGoCD8-1 TAGATATTTGGTGAAAATGATGATA ATTCTGGGGTGTGACTCATGTGATCTGAAAATGCCATCCATTTCTCACCTTCATGCCT

GGoCD8-2 TAGATATTTGGTGAAAATGATGATA ATTCTGGGGTGTGACTCATGTGATCTGAAAATGCCATCCATTTCTCACCTTCATGCCT

---

GGoCD9 TCCTTCCTGGAAGGGGTGATGTGTCTAGCACACAGCCCGAGATAAGGACTCTGACTGCGTTTACGTGTGATTAACATGTTGAGTGCTCTGACCTTCTGCGGCACTG  
GGoCD10 AAGCTACAGTGTTTGAGTGATGACTTTCACAAATTGTCGGATACCCCTTCACTCCTTTTGTAGTGAGAACTGTGGTCTGACCAACCTGTATGCAA

**Guide box H/ACA SnoRNA**

GGgACA1a GCGAATATTCTCGCTGCCCTGATATTCCGGTGATCAGGGGAGGCTAGACATTTCGCTATATTTAAACTATGCATTGTGTCTCCAGGACTGGACTGCTGCTCTAGTAC  
TGGCTTTGAAAATGCTAGTGACATAC

GGgACA1b GCGAATATTCTCGCTGCCCTGATATTCCGGTGATCAGGGGAGGCTAGACATTTCGCTATATTTAAACTATGCATTGTGTCTCCAGGACTGGACTGCTGCTCTAGTAC  
TGGCTTTGAAAATGCTAGTGACATAC

GGgACA2 TAGCAGGCTGCAATTGCAGTGTTCATTCTGTGGGAGTACTGCCATTTTCTGCTGAGAGTATTCTGTTAATGCTGTGTTTTGGTTTTTACCTATATGTTGGTGAAAC  
TGTTTTGTCTTAACATGACATCA

GGgACA3 AGCACTGCCTTTGAACCTGATGTGTCTTGTGTTGTAGCTTCATGGGCCAAGCAGCAGTGTAGAGCAAAAGGACTTGTATAACTGGGGCTCTCAGCTCTCAACTGA  
ACTGCTCTTTTAAAAACAAGGTACACTT

GGgACA4a GCATCTGAATCTTTCCCACTCCTTTCGATGTAGTGCCGGACTGGGGACACATGATGCAACAGGAAGCAGAGGAAATCCAGACAGGCTCTTTCAGTATTGGGGTT  
TGTCTCTACACCTTTGCAACATTT

GGgACA4b GGCACCTAATCTTTCCATTCTTGTGTGCAGTGTGAGCCTGGGGACGCATGGTGCTGACAGAAAGCAGAGTAAATCCAGACAAGTGGTTCTTCATTGACTAATT  
GTCTCTACACCTCTGCAACATTT

GGgACA4c AGCACCTGAATCTTTCCATTCTTGTGTGCAGTGCAGGCTGGGGACAGTTGGTGCTACAGCACAGCAGAGAAATCCAGATGGGGTACTTTCCACTCGCTTGGAA  
ACTCATCTCTACAGCTCTGCAACATTT

GGgACA5 GCCTTGTTATTTCAGCAGGTAGACACAACCTCCATGTGTGTCTCAATTGAAGAACGGGGCTAGAAGAGCAACAGGTTGTGCTTTCCTCACTGTAACACCCATTGCAGTG  
GTGACAATGAGACCTGTGACAGGT

GGgACA6 GCATACGAGTAGACCCTTTCTGACTCTGCCTGTAGTCGTAAGGGGGACAATGTATGCAACAGCAAGCATGAGTTGCCAGCGGGCTGTTCTGGGCAGCTCTGTGA  
CTGATCGGCCTCTGGTGCTTGTACAGAA

GGgACA7 GCATCCTCTGATAGACCACGAGCAGTTTTCTGTGCTCTCTGGTTTGCCTGAGATGCAAAAGTAACTTCTTGCCTTTCTGCCTGCCTGCTTGTGGCAGTTTCAG  
ATTGAATTAGGGAATACATG

GGgACA8 CCTGCATTTCGAAAGTGATCGTGGTCTGCTGCGTGGCCCGGTCATTGATAGTGCAGGGAGAGGAACACGAAGGCGTTTTCCCGTGTGTTGGTGGGCTGTGCTATCCCT  
CCCAAACCTGTAGCGTTCGGACATCG

---

---

|          |                                                                                                                                                                                                                                             |
|----------|---------------------------------------------------------------------------------------------------------------------------------------------------------------------------------------------------------------------------------------------|
| GGgACA9  | GCACTATTTTTAAACCTGTTGGTGGATTTTCCTGGCCATCATGGGTTACGCTGTAGTGC <span style="border: 1px solid black;">AAAAGA</span> ATCTCCTGGCTCTTCAGAGTATAGTTGGCCTTCTGTTGGCT<br>GATGCTGCTCTGAAGCTAAGGG <span style="border: 1px solid black;">ACA</span> GAG  |
| GGgACA10 | TCCCATTTATTTGCTTCCATGCCATCTCAGTGGCATGAGTAGTTATACGCATGGGAA <span style="border: 1px solid black;">AGAGTA</span> TACAAGTCCACTGCATATGAGAGGTGAAAGTAACAGTATTTTCAT<br>CTTGCTGCTGGGGATGG <span style="border: 1px solid black;">ACA</span> ACT     |
| GGgACA11 | GGTCGCTTCAAAGAGGGTTTTGCATGGCTGGAGAACCAGCAGCTCTTAACGCAGTGACCGT <span style="border: 1px solid black;">ACATTGA</span> ACTCCTTTCAGCAGGATGCTGTAGCCACTTTGTGTGTGCT<br>GTGGTCTATTTTCAGAGGAG <span style="border: 1px solid black;">ACA</span> AAT  |
| GGgACA12 | GCAGACTCACTCTGTACTGAACTGCAGTCTTCAGTTCAGGTGCTTTTTCTGTCTGCA <span style="border: 1px solid black;">AGAGTA</span> ATCACTCACAGGCGTGATGAATGCCTTCTTTCCTGTGGAAGGCT<br>GTTACAATTGCTAATGGG <span style="border: 1px solid black;">ACA</span> TTG     |
| GGgACA13 | ACCCTCCTTTCACTTTGCCAGTTAGACACTTTTTTGTCTTGATTGGTCATTCAAGGTGGGT <span style="border: 1px solid black;">AAAGTA</span> TACATCCTTTTAAAACCCAAGCAAATGGTGGTCATTTGTC<br>TTGGATCCTGTTCAGAGGAA <span style="border: 1px solid black;">ACA</span> GGT   |
| GGgACA14 | GCACAGTGAACACCCAAGTGTGCTTTCATAGTTCCTTGGTTTTAATTCTGTGCT <span style="border: 1px solid black;">AGAATA</span> ACCTGTGCTTTTCTCTGCATTGGAAGGATTGGCATTCTTTTATAT<br>GTATTCAGAAGGACAGT <span style="border: 1px solid black;">ACA</span> TTT        |
| GGgACA15 | GCAAGCAAACTCTGTAGTAAGCATTTGGTTGCCTGCTGCAATTTAAGCTTGCT <span style="border: 1px solid black;">AAATCA</span> GAAAAGTCTAACCTATTCCAGGATCTCTGCTTTGTGAGGTCGCTTG<br>TTATATAGACTTGT <span style="border: 1px solid black;">ACA</span> GCC           |
| GGgACA16 | TCCATGACTCCATGGGGGCTGCCGCTCGTGGCTGTCCCCCTTCCTAGGCATGGA <span style="border: 1px solid black;">AGAGCA</span> GCTTCTTGCTAATTGGCAAACCTTCTACCATGGCGTTGGTAGTAGTC<br>GTTGACTGTGGCAAGTA <span style="border: 1px solid black;">ACA</span> AGC      |
| GGgACA17 | GCACATTTCAATTGACCTGCTTTCATTGCAAGTGATGAGCAGTGTTATTTCTGGTGTGCT <span style="border: 1px solid black;">AAAGAA</span> ATATTTGAAGGCTAATTAGCAGCTTAGCTGTACGTAGTTACT<br>GCTGCCAGTCTCCTTCAT <span style="border: 1px solid black;">ACA</span> AAG    |
| GGgACA18 | AGGGTTTGTTTTGTCTGAAAGAAGCAGTATAATTTTCAGAGAATTAGGGAATTC <span style="border: 1px solid black;">AGAGAA</span> GTAGGGGTAGAACTTAATGGGCAAAGAAGCCCAAGGAGATTGAACTG<br>TTTGCCTTT <span style="border: 1px solid black;">ATA</span> TGC              |
| GGgACA19 | TTCTGCTTTGCAGCGGGAGCAGAGGGTATTTTCGTCCTCTCACTCCTGTGCGTTTCAGAGAGT <span style="border: 1px solid black;">AGAGTA</span> GAAGGTGTGTGGGCAGAGGCTGCAGGTTTGAGTGCC<br>TCAGCTAAGGCACCA <span style="border: 1px solid black;">ACA</span> GCA          |
| GGgACA20 | GCACGTGTTTCAGTTTTTGTCTGGTGCTGTAGACAAAAACCTGGAACCTGGTGCTT <span style="border: 1px solid black;">AGAAAA</span> ACACCTTCTTTTCGCAACCCACAGCTGATGCATGTATTGGCTGTGTT<br>ACTTATATGAAGGG <span style="border: 1px solid black;">ACA</span> GTG       |
| GGgACA21 | CTGGCTTCAGAGGCAGCCTGAAAGTGACTTTTTATTCTTCTGGCCTGTTGTCTCTAAAACCAAGT <span style="border: 1px solid black;">ACAGGA</span> GCATGCAGAACTGTTCAGATTTTATGGACAACACA<br>GCCCAAGAAGCTGCAAAGCTGCA <span style="border: 1px solid black;">ACA</span> CTC |

---



---

|           |                                                                                                                                                         |
|-----------|---------------------------------------------------------------------------------------------------------------------------------------------------------|
| GGgACA22a | GCAGCTGCGTCAAATTCGTTCCATCCAGCCCCGCGCTGGGGACCGGCCAAACAGCTGCCACAGCAACAGCCCCTGCAGCTCATGGGCCCCACTGTTGTTCTCTCT<br>CAACCCTGGGGATAAAATAAATGCTGCAGACACTG        |
| GGgACA22b | GCAGCCCAGTCAAATTCAGTCTCTGCCTCCATGGCGAGCACTGGCCATCCGGCTGCCACAGCAACATCTGTAGTCCATGGGCCCCACGTCCCCACCCATGGGAC<br>CCTGGGGATAAAATCGTGCCACAGACACTG              |
| GGgACA23  | CAGCCCCATCAAATTCAGTCCCTGCCCCCTCCACGGCAAGGATTGGCCTTCCAGCTGACACAGCACTGTCTGTAGTCCACGTGCCCGCATCCCTTCCCCTGGGACCT<br>TGGGGACAAAATGGTGCCACAGACACAC             |
| GGgACA24a | CCAAAAGTGTGAGTTCAGTTCAGGGTCTTGTCCTGTTCTGGTAATTAAGCTTTGGGACAGAAAGGACTGGGAAGTGCATCCTGGTGACTGAAAGCCTGTTTTATGC<br>CACCTGTGTTTTCTCAGCCTACAGAC                |
| GGgACA24b | TATGTTTTGAGTGGAAAAACACAGATTAGATACCAGAAGTGTGTTTAATAAATTCAATATGAGATGAGGGCTTCTAGGACTTCTGACAGGAGGTGTTCTAAGTGG<br>CTTTGGACAGACATGTTAGTCAGTACTGGGGACAAAG      |
| GGgACA25  | TTGCCTTTGTGTGCCCATTCATTCGCTTCTAAAATGAATGTGGTGTCAAAAAGGCAACAAGAATTCTTGCTCAAGCTGTGTAAGGGGCTGGCTATCTGCCTTTC<br>TCCTCCCTGTTTTTGCAAGGACAGAA                  |
| GGgACA26  | CCAAAAGCTTCATAATTGAGTGAAGGCTCTTGTAGCCTGAACTACTGGAGCTTCTTGGAAGAGAAAGACTATGCTCCACTATGGACTACACAGTTGTAGTTCGTCA<br>CTAACAATGTAGTCAACAATAA                    |
| GGgACA27  | GCAGACGGTTATCCCTCTGTAGCCTGTGTCTGTGGCTCTAGAGGGAGTCAGTCTGCTAAATGAAAGAGGGGAGGCTTTGCTGTCTGCTCCTGTCCAGGTGGCACTGGTG<br>CAGGCTGCAGGTCATTCCCACACTG              |
| GGgACA28  | TCCACAGTTACTGGTCTGAACTGTTTCCAGGACTGTAGCAGTTGCAGTATTCCCTCTGTGGAAGATAAACTGTTACGTAGTATTAAGCTCCTTCTCAGATCTTCTAAG<br>AAGGACTTTCTATGTAACAAACAATG              |
| GGgACA29  | GTCCTGTGTCCTGACCTCATCCTGACTCTTCCCCTCACCGGAGCTGTGGTGGTGGGGTCTGGGGGTGGACACAGATCACTTTACCCTCTCAAGTTAGGAGGGTTGCT<br>GAAGATGTTTGCAAACCCTTAAAGGCAAGAGAGGACATCG |
| GGgACA30  | AAGCAGGATAAGTTATGATATAGCTGTGCAGTGTGTATTATCGTTCCCCCTGCTTAAAGAAAAATGTTTCTTCTATCCCTACCTGCTTAGTTCCACAGCAGGTA<br>GGGACGCTGGGTTTCATACATCC                     |
| GGgACA31  | GCAAGGCTTCCAGCATGGTGGGGCTGCCGTGGCCCCATCCATTCTGCAGCGCTTGCCACAGCAGCCCTGGGGTGGTTTTGAGGCCTTTTCTGTCTCTCAGGGGGA<br>GGCTATAGAAACCCCATACACGC                    |
| GGgACA32  | GGTCCATTCTAATTCCTAGCAGGTTGGTGCCAGTACCTGTGGGTTTTCGCTTGTGGACCACATTAATACTGGAAGACTTAAATGTGTATGAGCTTACTGGTAGTTTGC<br>TCATGACATAGTTTTCTGGACATAC               |

---

---

|           |                                                                                                                                                                |
|-----------|----------------------------------------------------------------------------------------------------------------------------------------------------------------|
| GGgACA33  | GGAGGACTGAGAAGGTAAGACAGTTTTAACTTGGTACTGTATCTTACTGGTTATGGCCTCCGAAATTAATAAGGGTGCAATGGCAATTCATGTTCCCTCCCGACATG<br>AGGGAAAGCGATGCTGCATTTGCACATAAGG                 |
| GGgACA34  | TGGTCATTACCAAGGCTGCAAGGATATTGCTGTTCTTGGTGGAGCTGTGGACATGACCATAATAGCAAGTCCATCAGACTCTTGAATTGCTGCGTTGTGTGGCAGTAGG<br>TCTGCTGGGAATAAAG                              |
| GGgACA35  | CCTCCAGATCCCTTTCCCATCAGATCTGAATACCGATCTTGTGGTCGAAAAAGGAGGAAGAGCAGCATTTCAGACTGGCCTTGGCCTCTTTGCTGGCACAGCCCTGCT<br>CTGAGCGGGCCGTTTGAAGACAGTC                      |
| GGgACA36  | GCACACTGTTAAAGCTTGATGCTGAGGTCAGTTCCTGACCAATGAGCTCTCAAGTGTGGAAAGTGTGCTACAACAAGCTGTTGGCAGGGTGCTTGCTAATGCCAGG<br>AGAGGAGCTGCCCTATGATTGGAGTTTGATAGCAGCCCTGCCACATGC |
| GGgACA37  | AGCACTTCACATCTTTTTCTTTAATAGTGGGAACAAAGATATTTGAAGTGCTAAAAGAAGTGAAGGTAAATTAGCAGTGTGGTTAATGTTGCCAGTACTGTCAG<br>TCACCTTCATACAATAA                                  |
| GGgACA38  | GCATCTGTTTGACAGACCTGGAGCAAAAACCCATTGCTTTTTCTGGTCTTGTGAGATGCACAGAAACAGGTTCCCTTGCCTTTCCACCTGCCTGTCTTGTGGCA<br>GTCTGGATTGAAGAAAGGAATACAAC                         |
| GGgACA39a | GCACTGTTTCGTAACCTGTTAGCAGTGTAAATCTGTAAACGGGTTCCATTCCGGTGCTACATGATAACCCCAAGATAACAGAAGGCTGGCTGTTGTTGCCTGTTCC<br>CTTTATTTTGGGGACATAA                              |
| GGgACA39b | GCACTGCTCGTAACCTTTTGACAGCATATTCTGTGAATAGGTTCCATTCCAGTGCTACAACAATCCAGTAATGGAAGGCTGACAGACTCCATGTCCCTTCCGTAT<br>TTGGAGACATTC                                      |
| GGgACA40  | GCACACAGTTGGAACCTTGAGCTGAGGCCATCCTGTGGCCAAGGAACTCTCAAGCGTAGGATGTGTGCTACAGTAAACATGGCAGGACTTACTGACAGCCTGAGGGCC<br>TTTGTGGCCCAATGAAAGGAGTTTGGTAGTCAATCTTGCCACAGTT |
| GGgACA41  | CTGAGAATAGAGTCACATCTTTACATGTTCTGTTGTTCTGGTGTGCTATCGTTCTCAGATATAAACTTCTGATCCTCATTCACTGGCTGCGATACCTCATATCTCAG<br>TCAGCCACCAATCAGTGACAGTA                         |
| GGgACA42  | CGAGACTAGAGTCACGTCTGGACAGTGCCTGTTGTCCCAGTGTGCTAGAGTACTCGAATAGTAACCCTAATCTATATTCAGTGGCTGTGACCACTCCTGTCTCGGT<br>CAGTCACCAGATTAGTGACAGGA                          |
| GGgACA43  | GGCACAGTCTGAAAATCACCTGCGGTCTCCCGTGGCCCCGGTGAGATAACCGTGCCGACAGCATAGGGAACATCAAAGCTTATTGCCACGGTGACAGTGTGTGGG<br>GAGTGAAACCCGTGTTCCCATACC                          |
| GGgACA44a | ATGAGTTGCCATAAATCCTGCTGTCATTTCGTAACAGTTGGGAAATGGGTAAGGCCTCATCCATAACAAGTGGCCGCGAAGTAAAGTTTCTGCCTGGGAATTACA<br>TTTACTTTCCATCACAGATTCTCACAGTTTGCACATTC            |

---

---

GGgACA44b ATGAGTTGCCATAAATCCTGCTGTCATTTCGGAACAGTTGGGAAATGGGTAAAAGGCCTCATCCATAACACTGCCCGCAGAACTGAAAGTTTCTGCCTGGGAATTACA  
TTTACTTTCCATCACAGATTCTCACAGTTTGCACA

GGgACA45 CCCTTCTCAAAGCACTCGTTGGGTCTGCGTGCCGTGGCTCAGTGAGTTGTCGTGGAAGGGCAGAGAAAGCATCGCTTTTGGGTGAAGTGGCAGCCCGTGTGTTG  
ATTCAATGGGCGATGTGACACG

GGgACA46 CAGCCACCCGCCACTGTACCTGTCTTGTAAATGCAGTGACTTGTATAGTCCAGAGGTGGGCTGAGAGAAATGCCATCCTAGGAAACAGGGTTATTCTTCTTGTGGGT  
AACTCTGTGCCGAAGGCTGGGAACAGCA

GGgACA47 TCTCCAATCTGCGCGGTTGCATTTGCTTGAAGTAGTGAACTGTGTAATGGAGAGAGAAAGGAAACTGAATTTTAAGAGTATAACAGAGAGATCCTCTTATGGT  
CTCTCTGTTTCTCTGAAATTCTACACTT

GGgACA48 AAGTCAGCTAAGTGATACTGCAGCATTATGAATCATCTCTGTAACACTGAGCTGCTTTTTAAAGCACAATTTGTGGTGATAAAAGGTTTGAAGGTGACAAGCCTG  
CAGATCTTATTCTACTTACCCACAGACATAG

GGgACA49 GGAGGACTAAGAAAGTGGAGTTCGCTTTCATGCCCACCCGCTGATACTATCCTCCAAGGAAATGGTGAAGAACAAGGCTGCCCGCAGGTAAGGGCAGGG  
CCTGCTTCTCCACCTACAGGG

GGgACA50 GGGAGGCTGATACACAAATAGGGCTAAATCTGCTCTAGTTGTCACATGTTCTCCCTATAGTAATAATTGCCTTCTGATGACCGGACGAATTGAGGGAAATCGTAACG  
GACAGATACGGGGCACACAGT

GGgACA51 CTGTTGCCACGGAGATAATGACTTATCCCATGTCATTATTGATCTATCAACAGTAAAGCAATTTTGCAGTCTGATATTGTTTAGCAAATAGAGTAATGTCTGCTGA  
ACACTTAAAACTGCTATAAAT

GGgACA52 GCCACTGAAATCAGCCTAATATTAATGCATTGGCTGGTAAAGCTGATGGAAGGAAATTAGGTGAATCCAGCAGGCCAGAACAAGAGATATTTCTTACCTACT  
GCATGAACAAACTGCAGGGTTTTTTTTGCCTCCAGACATTT

**Orphan box H/ACA snoRNA**

GGoACA1 TGCACACAAAACCCAAAGAATGTTGTTCCCTCGTAATGACGTTCTTGTGCTGTGTGCAGATATTAATATGTATCTTGTGCGCTTCCAGAGCTGAGGTGCTCTTGAAA  
GTGAAACTTGAGGTTCTACATGACATA

GGoACA2 TGAGGTCTATCCCGATAGGATCTCTTCTGTAGGTTTCATGTCGTTGGAAACGCCTCACAGAACAACCTTGTGGTTTAGTTTTACCTTGGAGCTACCTGTTAGCTCTG  
TGGGATAGAACTACAAGACAAAT

GGoACA3 GCACTGAATGGTATCTGCACCCAGCAGCGTTCTTCTGATGGGTGTTCAAAAACCAGTGCACAGTAATTTCAGCATTTGGCATCGTTGGTTTTCACTCTGCAGTGGT  
TGTAAACCTGGTATTCTTGGCTGATACAGGT

GGoACA4 GTGGCTGTCTTTGCTGTTGGCTGCATTTGCTAGAAATGGAATGCAGCCGTGAGCAGCCACAGACAGTGAAGTAAATGGTTCCTGCCGACAGTGTCTGTAGAGTGATC

---

---

|          |                                                                                                                                                     |
|----------|-----------------------------------------------------------------------------------------------------------------------------------------------------|
|          | AGATTTTCTGTGCGATGGTTCCATACAICT                                                                                                                      |
| GGoACA5  | GGAGGACTAATCAGACTGAGTCTGAAGAGTGGGACTCAGTTGACAGTGATCTCCTAGAAGA<br>AAAGGGATGGAGAGAGCAGTCCTATGTAGAAGAAAGCAAAGGGCCC<br>ACTGTGCCATCCAACAGTG              |
| GGoACA6  | TCCATTATACTACCACTTTTCAATCTCCAGAGGAAGTGGCTATGCTTGTGGGATAGAGGA<br>AAATGTTGCCACGGTCTGAAGGAAAAGGTTGATTGTATCTTTTTC<br>CTACATGAAGTTGGCAGGACATCA           |
| GGoACA7  | GGTGATCTTTTTTTCCTTCTGGCATTGAGAGAGTTGCCTGAAGGTAACAAGCTCACCAAGATTA<br>AAATGGAGGTTGCCAAGGACTTGTTTAAAAGATGCTATCAAGT<br>CTGACCGAGAACTCCAACATCT           |
| GGoACA8  | TGTGGTGGTTTCTTTGTTTGGCAGATCTGTAATGTATCAGAGCGGCCTGAAACTACCACAGAGATCA<br>AAAAGGAGGGAGGCTGTGCTGAGAACGTTTTTCAGGCTCT<br>CAGTTCTCAGCTTTTATTCAACTCCTATAGAA |
| GGoACA9  | CCCTCCCCACGCTTACCGCGGGTGGCTGCGCCTCCAACCGCCCGCACAGAACGGGGAGGAGAGCA<br>CGGCCTCGGTAACACCCCGCCGGGGCGGCGGTGCTGCGGC<br>CGGATTGTGACCGGGGGACACGG            |
| GGoACA10 | GCTCACAAGAACAATTATCCTGCCACGTGGCTGAGATGGGTTCTGGGACAATGTGAGCTAGATCA<br>AGAGTATTGCTTTGGGAGTGTCTCATTTTCAGGACCCATGGGG<br>CACTACAGTTTTCAATACAACACGT       |

---
